# Supplementary material
Source: PubMed Central journal article supplement (PMC5363204)
Supplement: mmc1.pdf [file mmc1.pdf]

YMTHE, Volume 25

## **Supplemental Information**

### **Near-Complete Correction of Profound Metabolomic Impairments Corresponding to Functional Benefit in MPS IIIB Mice after IV rAAV9-hNAGLU Gene Delivery**

**Haiyan Fu, Aaron S. Meadows, Tierra Ware, Robert P. Mohny, and Douglas M. McCarty**

| Supplementary Table S1 Metabolomic impairments in MPS IIB mice and their responses to an IV injection of rAAV8-CMV-hNAGLU vector |                                          |                             |                 |                 |                  |                  |                |                  |                    |
|----------------------------------------------------------------------------------------------------------------------------------|------------------------------------------|-----------------------------|-----------------|-----------------|------------------|------------------|----------------|------------------|--------------------|
| Pathways                                                                                                                         | Sub-pathways                             | Metabolites                 | Fold of Change  |                 |                  |                  |                |                  |                    |
|                                                                                                                                  |                                          |                             | IIB-2m<br>WT-2m | IIB-7m<br>WT-7m | AAV9-2m<br>WT-2m | AAV9-7m<br>WT-7m | WT-7m<br>WT-2m | IIB-7m<br>IIB-2m | AAV9-7m<br>AAV9-2m |
| Amino Acid                                                                                                                       | Glycine, Serine and Threonine Metabolism | glycine                     | 0.69            | 0.11            | 0.92             | 1.01             | 0.8            | 0.13             | 0.88               |
|                                                                                                                                  |                                          | N-acetylglycine             | 0.43            | 0.12            | 0.64             | 1.3              | 0.68           | 0.19             | 1.39               |
|                                                                                                                                  |                                          | sarcosine (N-Methylglycine) | 1.22            | 2.44            | 0.77             | 0.86             | 0.9            | 1.81             | 1.01               |
|                                                                                                                                  |                                          | dimethylglycine             | 0.99            | 0.4             | 0.77             | 1.84             | 0.65           | 0.26             | 1.55               |
|                                                                                                                                  |                                          | betaine                     | 0.99            | 0.84            | 1.13             | 0.85             | 0.9            | 0.77             | 0.67               |
|                                                                                                                                  |                                          | serine                      | 0.83            | 0.09            | 1.09             | 0.85             | 0.95           | 0.11             | 0.74               |
|                                                                                                                                  |                                          | N-acetyserine               | 0.74            | 0.29            | 0.52             | 3.6              | 0.53           | 0.21             | 3.69               |
|                                                                                                                                  |                                          | beta-hydroxypyruvate        | 1.22            | 0.59            | 0.99             | 1.15             | 0.86           | 0.42             | 1                  |
|                                                                                                                                  | threonine                                | 1.45                        | 1.11            | 0.6             | 1.47             | 0.76             | 0.58           | 1.85             |                    |
|                                                                                                                                  | Alanine and Aspartate Metabolism         | alanine                     | 1.03            | 0.13            | 1.17             | 0.72             | 1.02           | 0.12             | 0.63               |
|                                                                                                                                  |                                          | N-acetylanine               | 1.01            | 0.28            | 0.73             | 1.2              | 0.89           | 0.25             | 1.47               |
|                                                                                                                                  |                                          | aspartate                   | 1.23            | 0.51            | 0.52             | 0.56             | 0.84           | 0.35             | 0.91               |
|                                                                                                                                  |                                          | asparagine                  | 0.73            | 0.16            | 0.98             | 0.88             | 0.87           | 0.2              | 0.79               |
|                                                                                                                                  |                                          | N-acetylaspartate (NAA)     | 1.02            | 0.21            | 0.84             | 1.54             | 1.01           | 0.21             | 1.83               |
|                                                                                                                                  | Glutamate Metabolism                     | glutamate                   | 0.95            | 0.37            | 0.77             | 0.96             | 0.96           | 0.37             | 1.19               |
|                                                                                                                                  |                                          | glutamine                   | 1.15            | 0.53            | 1.01             | 0.92             | 0.97           | 0.45             | 0.89               |
|                                                                                                                                  |                                          | N-acetylglutamate           | 0.47            | 0.43            | 0.29             | 3.46             | 0.56           | 0.51             | 6.54               |
|                                                                                                                                  |                                          | N-acetylglutamine           | 0.45            | 0.3             | 0.44             | 2.47             | 0.66           | 0.45             | 3.69               |
|                                                                                                                                  | Histidine Metabolism                     | histidine                   | 0.95            | 0.47            | 0.94             | 1.09             | 0.89           | 0.45             | 1.04               |
|                                                                                                                                  |                                          | N-acetylhistidine           | 0.49            | 0.18            | 0.5              | 1.68             | 0.68           | 0.25             | 2.28               |
|                                                                                                                                  |                                          | trans-urocanate             | 1.06            | 0.2             | 0.97             | 0.72             | 1.52           | 0.28             | 1.12               |
|                                                                                                                                  |                                          | cis-urocanate               | 0.81            | 0.33            | 0.76             | 1.2              | 1.17           | 0.47             | 1.85               |
|                                                                                                                                  |                                          | imidazole propionate        | 0.55            | 0.64            | 0.32             | 3.06             | 0.58           | 0.68             | 5.53               |
|                                                                                                                                  |                                          | 1-methylimidazoleacetate    | 0.74            | 0.26            | 0.53             | 2.57             | 0.87           | 0.31             | 4.26               |
|                                                                                                                                  | Lysine Metabolism                        | lysine                      | 0.77            | 0.18            | 0.68             | 0.61             | 0.67           | 0.16             | 0.6                |
|                                                                                                                                  |                                          | 2-aminoadipate              | 1.08            | 0.99            | 0.61             | 1.27             | 0.66           | 0.61             | 1.4                |
|                                                                                                                                  |                                          | pipecolate                  | 0.98            | 0.5             | 0.89             | 2.83             | 0.77           | 0.4              | 2.46               |
|                                                                                                                                  |                                          | 5-aminovalerate             | 1.53            | 0.9             | 1.01             | 2.02             | 0.91           | 0.53             | 1.82               |
|                                                                                                                                  | Phenylalanine and Tyrosine Metabolism    | phenylalanine               | 0.96            | 0.43            | 0.83             | 1.09             | 0.85           | 0.38             | 1.12               |
|                                                                                                                                  |                                          | N-acetylphenylalanine       | 0.9             | 0.33            | 0.87             | 0.99             | 0.86           | 0.32             | 0.97               |
| phenyllactate (PLA)                                                                                                              |                                          | 1.23                        | 0.58            | 0.93            | 1.85             | 1.03             | 0.48           | 2.04             |                    |

|                                           |                                     |             |             |             |             |             |             |              |
|-------------------------------------------|-------------------------------------|-------------|-------------|-------------|-------------|-------------|-------------|--------------|
|                                           | phenylacetate                       | 1           | 0.49        | 0.99        | 1.05        | 0.64        | <b>0.31</b> | 0.68         |
|                                           | phenylacetylglycine                 | 0.34        | <b>0.23</b> | 0.25        | <b>6.55</b> | 0.42        | <b>0.29</b> | <b>10.89</b> |
|                                           | tyrosine                            | 1.12        | 0.72        | 1.03        | 0.82        | 0.94        | <b>0.6</b>  | 0.75         |
|                                           | N-acetyltyrosine                    | 0.68        | <b>0.26</b> | 0.75        | 0.52        | 0.82        | <b>0.31</b> | 0.57         |
|                                           | 4-hydroxycinnamate                  | <b>0.25</b> | <b>0.25</b> | <b>0.22</b> | 0.38        | <b>0.66</b> | <i>0.64</i> | 1.12         |
|                                           | 4-hydroxyphenylpyruvate             | 0.81        | 0.79        | 0.77        | 1.53        | 0.73        | 0.71        | 1.46         |
|                                           | 3-(4-hydroxyphenyl)lactate          | 1.1         | <b>0.41</b> | 0.94        | 1.32        | 0.98        | <b>0.36</b> | 1.37         |
|                                           | phenol sulfate                      | 0.46        | <b>0.31</b> | 0.46        | <b>2.61</b> | 0.52        | <b>0.34</b> | <b>2.94</b>  |
|                                           | p-cresol sulfate                    | 0.87        | <b>0.26</b> | 0.73        | 3.18        | 0.82        | <b>0.24</b> | 3.54         |
|                                           | 2-amino-p-cresol sulfate            | 0.15        | 0.47        | 0.24        | 6.24        | 0.31        | 0.97        | 8.2          |
|                                           | homovanillate sulfate               | 0.28        | 0.46        | 0.22        | 6.65        | 0.41        | 0.67        | <b>12.4</b>  |
|                                           | phenylpropionylglycine              | 0.44        | 0.23        | 0.59        | 2.71        | 0.95        | 0.49        | 4.39         |
|                                           | 2-(4-hydroxyphenyl)propionate       | 0.7         | 0.53        | 0.39        | <b>9.94</b> | 0.62        | 0.46        | <b>15.7</b>  |
|                                           | 3-phenylpropionate (hydrocinnamate) | 1.01        | 0.6         | 1.42        | <b>0.36</b> | 1.15        | 0.69        | <b>0.29</b>  |
| Tryptophan Metabolism                     | tryptophan                          | 0.73        | <b>0.39</b> | 0.72        | 0.97        | <b>0.66</b> | <b>0.36</b> | 0.89         |
|                                           | N-acetyltryptophan                  | <b>0.58</b> | <b>0.26</b> | 0.64        | 1.18        | <b>0.55</b> | <b>0.24</b> | 1            |
|                                           | indolelactate                       | 0.63        | <b>0.18</b> | <b>0.45</b> | <b>4.26</b> | <b>0.56</b> | <b>0.16</b> | <b>5.37</b>  |
|                                           | indolepropionate                    | 1.79        | 0.79        | <b>1.8</b>  | 1.63        | <b>0.59</b> | <b>0.26</b> | <b>0.53</b>  |
|                                           | 3-indoxyl sulfate                   | 0.92        | 0.64        | 0.69        | <b>2.8</b>  | 0.65        | <b>0.46</b> | <b>2.66</b>  |
|                                           | kynurenine                          | <b>0.61</b> | <b>0.26</b> | <b>0.6</b>  | 0.98        | 0.74        | <b>0.32</b> | 1.21         |
|                                           | kynurenate                          | <b>0.32</b> | 0.62        | <b>0.31</b> | 3.25        | 0.54        | 1.06        | <b>5.67</b>  |
|                                           | xanthurenate                        | 0.15        | 0.36        | 0.14        | 3.93        | 0.47        | 1.15        | <b>13.47</b> |
|                                           | 5-hydroxyindoleacetate              | 0.36        | <b>0.12</b> | 0.24        | 3.65        | 0.63        | <b>0.21</b> | <b>9.49</b>  |
|                                           | serotonin (5HT)                     | 0.75        | <b>0.05</b> | 0.74        | 0.57        | 0.97        | <b>0.06</b> | 0.75         |
|                                           | C-glycosyltryptophan                | 0.9         | <b>0.24</b> | 0.62        | <b>3.11</b> | 0.65        | <b>0.17</b> | <b>3.26</b>  |
| Leucine, Isoleucine and Valine Metabolism | leucine                             | 1           | <b>0.39</b> | 0.77        | 1           | 0.83        | <b>0.33</b> | 1.08         |
|                                           | N-acetylleucine                     | 1.01        | <b>0.46</b> | 0.8         | 1.05        | 0.86        | <b>0.39</b> | 1.12         |
|                                           | 4-methyl-2-oxopentanoate            | <b>0.46</b> | <b>0.37</b> | 0.63        | 0.65        | 0.64        | 0.51        | 0.67         |
|                                           | isovalerate                         | 0.64        | <b>0.28</b> | 0.6         | 0.58        | 0.66        | <b>0.29</b> | 0.64         |
|                                           | isovalerylglycine                   | 0.3         | 0.28        | 0.26        | <b>6.33</b> | 0.38        | 0.36        | <b>9.34</b>  |
|                                           | isovalerylcarnitine                 | 1.13        | <b>0.49</b> | 0.74        | 1.06        | 0.78        | <b>0.34</b> | 1.1          |
|                                           | 3-methylcrotonylglycine             | 0.33        | 0.45        | <b>0.24</b> | <b>4.2</b>  | 0.51        | 0.69        | <b>8.78</b>  |
|                                           | beta-hydroxyisovalerate             | 0.74        | <b>0.25</b> | 0.7         | <b>2.46</b> | 0.66        | <b>0.22</b> | <b>2.32</b>  |
|                                           | beta-hydroxyisovaleroylcarnitine    | 1.13        | <b>0.51</b> | 0.98        | <b>1.42</b> | 0.77        | <b>0.35</b> | 1.11         |

|  |                                                  |                               |      |      |      |      |      |      |      |
|--|--------------------------------------------------|-------------------------------|------|------|------|------|------|------|------|
|  |                                                  | alpha-hydroxyisovalerate      | 1.01 | 0.54 | 1.22 | 1.05 | 0.83 | 0.45 | 0.71 |
|  |                                                  | isoleucine                    | 0.83 | 0.38 | 0.78 | 0.94 | 0.8  | 0.37 | 0.97 |
|  |                                                  | 3-methyl-2-oxovalerate        | 0.33 | 0.39 | 0.65 | 0.69 | 0.61 | 0.72 | 0.64 |
|  |                                                  | 2-methylbutyrylcarnitine (C5) | 1.31 | 0.55 | 0.67 | 1.61 | 0.63 | 0.27 | 1.52 |
|  |                                                  | 2-methylbutyrylglycine        | 0.44 | 0.45 | 0.38 | 3.41 | 0.65 | 0.66 | 5.8  |
|  |                                                  | tigloylglycine                | 0.48 | 0.5  | 0.37 | 2.44 | 0.53 | 0.55 | 3.49 |
|  |                                                  | 2-hydroxy-3-methylvalerate    | 0.82 | 0.53 | 0.79 | 1.46 | 0.68 | 0.44 | 1.27 |
|  |                                                  | valine                        | 0.81 | 0.41 | 0.77 | 0.93 | 0.85 | 0.43 | 1.03 |
|  |                                                  | 3-methyl-2-oxobutyrate        | 0.43 | 0.41 | 0.71 | 0.81 | 0.76 | 0.71 | 0.86 |
|  |                                                  | isobutyrylcarnitine           | 2.25 | 0.63 | 1.16 | 1.93 | 0.8  | 0.23 | 1.34 |
|  |                                                  | 3-hydroxyisobutyrate          | 0.75 | 0.47 | 0.72 | 0.83 | 0.63 | 0.4  | 0.74 |
|  |                                                  | alpha-hydroxyisocaproate      | 0.81 | 0.54 | 0.8  | 0.97 | 0.84 | 0.55 | 1.02 |
|  | Methionine, Cysteine, SAM and Taurine Metabolism | methionine                    | 1.21 | 0.64 | 1    | 0.97 | 0.84 | 0.45 | 0.81 |
|  |                                                  | N-acetylmethionine            | 1.28 | 0.65 | 0.96 | 1.34 | 0.6  | 0.31 | 0.84 |
|  |                                                  | N-formylmethionine            | 0.73 | 0.29 | 0.47 | 2.41 | 0.6  | 0.24 | 3.1  |
|  |                                                  | 2-aminobutyrate               | 0.93 | 0.42 | 0.9  | 1.09 | 0.88 | 0.4  | 1.06 |
|  |                                                  | 2-hydroxybutyrate (AHB)       | 0.57 | 0.2  | 0.62 | 0.89 | 0.81 | 0.29 | 1.17 |
|  |                                                  | cysteine                      | 1.11 | 0.59 | 0.6  | 2.91 | 0.73 | 0.39 | 3.56 |
|  |                                                  | cystine                       | 1    | 1.56 | 1    | 1.88 | 1    | 1.56 | 1.88 |
|  |                                                  | taurine                       | 1.12 | 0.44 | 0.39 | 1.91 | 0.99 | 0.39 | 4.88 |
|  | Urea cycle; Arginine and Proline Metabolism      | arginine                      | 1.27 | 0.98 | 1.61 | 1.04 | 1.22 | 0.94 | 0.79 |
|  |                                                  | urea                          | 0.93 | 0.56 | 0.68 | 2.38 | 0.65 | 0.39 | 2.29 |
|  |                                                  | ornithine                     | 0.99 | 0.16 | 0.53 | 0.35 | 0.75 | 0.12 | 0.49 |
|  |                                                  | proline                       | 1.27 | 0.51 | 0.9  | 0.92 | 0.81 | 0.32 | 0.82 |
|  |                                                  | citrulline                    | 1.03 | 0.87 | 0.87 | 1.52 | 0.73 | 0.61 | 1.27 |
|  |                                                  | N-alpha-acetylornithine       | 1.23 | 0.46 | 0.97 | 1.41 | 0.59 | 0.22 | 0.85 |
|  |                                                  | trans-4-hydroxyproline        | 1.1  | 0.2  | 1.17 | 0.78 | 0.61 | 0.11 | 0.41 |
|  | Creatine Metabolism                              | pro-hydroxy-pro               | 0.64 | 0.25 | 0.61 | 2.93 | 0.35 | 0.14 | 1.71 |
|  |                                                  | creatine                      | 1.04 | 0.23 | 0.71 | 0.74 | 1.08 | 0.24 | 1.12 |
|  |                                                  | creatinine                    | 0.55 | 0.73 | 0.5  | 2.43 | 0.66 | 0.89 | 3.23 |
|  | Polyamine Metabolism                             | spermidine                    | 1.63 | 0.9  | 0.8  | 2.34 | 0.98 | 0.54 | 2.88 |
|  |                                                  | 5-methylthioadenosine (MTA)   | 0.67 | 0.5  | 0.58 | 2.84 | 0.6  | 0.45 | 2.93 |
|  | Guanidino and Acetamido Metabolism               | 4-guanidinobutanoate          | 0.67 | 0.59 | 0.28 | 5.96 | 0.44 | 0.39 | 9.3  |

|                    |                                                      |                                |      |      |      |      |      |      |       |
|--------------------|------------------------------------------------------|--------------------------------|------|------|------|------|------|------|-------|
|                    | Glutathione Metabolism                               | glutathione, oxidized (GSSG)   | 1.39 | 0.56 | 0.61 | 1.48 | 0.71 | 0.28 | 1.71  |
|                    |                                                      | cysteine-glutathione disulfide | 1.32 | 0.6  | 0.81 | 2.2  | 0.69 | 0.31 | 1.86  |
|                    |                                                      | S-methylglutathione            | 0.65 | 0.62 | 0.21 | 2.61 | 0.29 | 0.28 | 3.66  |
|                    |                                                      | 5-oxoproline                   | 1.02 | 0.39 | 0.76 | 0.96 | 0.94 | 0.36 | 1.19  |
| Peptide            | Gamma-glutamyl Amino Acid                            | gamma-glutamylalanine          | 1.13 | 0.84 | 1.26 | 1.59 | 0.55 | 0.41 | 0.7   |
|                    |                                                      | gamma-glutamylglutamate        | 1.19 | 0.45 | 0.89 | 1.01 | 1.15 | 0.43 | 1.3   |
|                    |                                                      | gamma-glutamylisoleucine*      | 0.84 | 0.78 | 0.85 | 1.24 | 0.79 | 0.73 | 1.15  |
|                    |                                                      | gamma-glutamylleucine          | 1    | 0.49 | 0.7  | 1.24 | 0.61 | 0.3  | 1.08  |
|                    |                                                      | gamma-glutamylphenylalanine    | 0.98 | 0.62 | 0.77 | 1.52 | 0.55 | 0.34 | 1.09  |
|                    |                                                      | gamma-glutamylthreonine*       | 0.93 | 0.59 | 0.73 | 1.42 | 0.71 | 0.46 | 1.38  |
|                    |                                                      | gamma-glutamyltryptophan       | 1.01 | 0.47 | 0.74 | 1.45 | 0.72 | 0.34 | 1.43  |
|                    |                                                      | gamma-glutamyltyrosine         | 1.23 | 0.81 | 0.97 | 1.01 | 0.65 | 0.42 | 0.67  |
|                    |                                                      | gamma-glutamylvaline           | 0.74 | 0.4  | 0.73 | 1.57 | 0.63 | 0.34 | 1.35  |
|                    | Dipeptide Derivative                                 | anserine                       | 0.87 | 0.4  | 0.59 | 0.64 | 1.65 | 0.76 | 1.77  |
|                    | Dipeptide                                            | alanylalanine                  | 0.56 | 0.27 | 0.8  | 1.38 | 0.69 | 0.33 | 1.19  |
|                    |                                                      | alpha-glutamylalanine          | 1.08 | 1.18 | 0.97 | 0.97 | 1.16 | 1.26 | 1.16  |
|                    | Polypeptide                                          | bradykinin                     | 1    | 1.17 | 1    | 1    | 1    | 1.17 | 1     |
|                    | Fibrinogen Cleavage Peptide                          | TDTEDKGEFLSEGGGV*              | 0.86 | 0    | 0.96 | 0.83 | 0.91 | 0    | 0.79  |
| TDTEDKGEFLSEGGGVR* |                                                      | 2.22                           | 0.45 | 1.16 | 5.09 | 0.82 | 0.17 | 3.61 |       |
| Carbohydrate       | Glycolysis, Gluconeogenesis, and Pyruvate Metabolism | 1,5-anhydroglucitol (1,5-AG)   | 0.8  | 0.28 | 0.7  | 1.26 | 0.82 | 0.29 | 1.49  |
|                    |                                                      | glucose                        | 0.92 | 0.47 | 0.94 | 1.29 | 0.77 | 0.39 | 1.05  |
|                    |                                                      | fructose-6-phosphate           | 1.02 | 0.18 | 0.43 | 1.1  | 1.19 | 0.21 | 3.05  |
|                    |                                                      | 2,3-diphosphoglycerate         | 0.79 | 5.57 | 0.75 | 1.07 | 1.01 | 7.12 | 1.45  |
|                    |                                                      | 3-phosphoglycerate             | 1.1  | 0.66 | 0.48 | 0.77 | 1.32 | 0.79 | 2.1   |
|                    |                                                      | phosphoenolpyruvate (PEP)      | 1.14 | 0.45 | 0.54 | 0.91 | 1.15 | 0.45 | 1.95  |
|                    |                                                      | pyruvate                       | 0.78 | 1.3  | 1.38 | 0.97 | 0.95 | 1.59 | 0.67  |
|                    |                                                      | lactate                        | 1.37 | 0.74 | 1.12 | 0.97 | 0.9  | 0.49 | 0.77  |
|                    |                                                      | glycerate                      | 0.76 | 0.22 | 0.77 | 1.1  | 0.77 | 0.23 | 1.1   |
|                    | Pentose Phosphate Pathway                            | sedoheptulose-7-phosphate      | 1.81 | 0.24 | 0.49 | 1.11 | 1.84 | 0.25 | 4.14  |
|                    |                                                      | ribulose/xylulose 5-phosphate  | 1.1  | 0.13 | 0.5  | 0.91 | 0.88 | 0.1  | 1.6   |
|                    | Pentose Metabolism                                   | ribulose                       | 0.93 | 0.2  | 0.9  | 1.06 | 0.72 | 0.15 | 0.84  |
|                    |                                                      | ribose                         | 0.56 | 0.19 | 0.92 | 0.64 | 0.63 | 0.21 | 0.44  |
|                    |                                                      | ribitol                        | 0.57 | 0.35 | 0.67 | 1.54 | 0.8  | 0.49 | 1.83  |
|                    |                                                      | xylonate                       | 0.41 | 0.33 | 0.31 | 6.97 | 0.44 | 0.36 | 10.04 |

|                           |                                            |                         |                |             |             |             |             |             |              |
|---------------------------|--------------------------------------------|-------------------------|----------------|-------------|-------------|-------------|-------------|-------------|--------------|
|                           |                                            | xylose                  | 0.77           | 1.33        | <b>0.32</b> | <b>9.55</b> | 0.38        | 0.66        | <b>11.46</b> |
|                           |                                            | xylitol                 | 0.81           | <b>0.29</b> | <b>0.53</b> | 1.56        | <b>0.58</b> | <b>0.21</b> | 1.73         |
|                           |                                            | threitol                | 0.88           | 0.79        | <b>0.39</b> | <b>6.94</b> | <b>0.4</b>  | <b>0.36</b> | <b>7.12</b>  |
|                           |                                            | arabitol                | 0.67           | <b>0.24</b> | 0.35        | <b>7.66</b> | <b>0.41</b> | <b>0.14</b> | 8.78         |
|                           |                                            | fucose                  | 0.4            | <b>0.21</b> | 0.41        | <b>6.12</b> | 0.47        | <b>0.25</b> | <b>7.01</b>  |
|                           | Fructose, Mannose and Galactose Metabolism | fructose                | 0.69           | <b>0.12</b> | 0.86        | 1.82        | 0.65        | <b>0.11</b> | 1.37         |
|                           |                                            | sorbitol                | 0.81           | <b>0.27</b> | 0.71        | <b>1.92</b> | 0.65        | <b>0.22</b> | 1.76         |
|                           |                                            | mannose                 | 0.75           | <b>0.29</b> | 0.83        | <b>1.5</b>  | <b>0.63</b> | <b>0.24</b> | 1.14         |
|                           |                                            | mannitol                | 0.93           | 0.57        | 0.49        | 15.4        | 1.04        | 0.64        | <b>32.57</b> |
|                           | Aminosugar Metabolism                      | N-acetylglucosamine     | 1.15           | 0.43        | <b>0.45</b> | <b>3.33</b> | <b>0.5</b>  | <b>0.18</b> | <b>3.69</b>  |
|                           |                                            | N-acetylneuraminate     | 0.78           | <b>0.3</b>  | 0.53        | <b>2.87</b> | 0.66        | <b>0.25</b> | <b>3.54</b>  |
|                           |                                            | erythronate*            | 0.39           | <b>0.17</b> | <b>0.35</b> | <b>4.1</b>  | 0.49        | <b>0.21</b> | <b>5.71</b>  |
|                           | Advanced Glycation End-product             | erythulose              | 0.94           | <b>0.49</b> | 0.74        | 1.8         | 0.67        | <b>0.34</b> | 1.62         |
|                           | <b>Energy</b>                              | TCA Cycle               | citrate        | 0.82        | 0.48        | 0.72        | <b>4.18</b> | 0.79        | <b>0.47</b>  |
| cis-aconitate             |                                            |                         | 0.89           | 0.79        | 0.85        | <b>1.74</b> | 0.88        | 0.78        | <b>1.8</b>   |
| alpha-ketoglutarate       |                                            |                         | 0.51           | 0.29        | 1.11        | 1.15        | 3.21        | 1.85        | 3.34         |
| succinylcarnitine         |                                            |                         | 0.93           | <b>0.29</b> | 0.7         | 1.22        | 1.18        | <b>0.36</b> | <b>2.04</b>  |
| succinate                 |                                            |                         | 6.65           | 0.44        | 1.23        | 0.84        | 2.34        | 0.15        | 1.59         |
| fumarate                  |                                            |                         | 1.2            | <b>0.42</b> | 0.83        | 1.33        | 0.97        | <b>0.34</b> | 1.56         |
| malate                    |                                            |                         | 1.5            | <b>0.33</b> | 0.9         | 0.9         | 1.23        | <b>0.27</b> | 1.23         |
| Oxidative Phosphorylation |                                            | pyrophosphate (PPi)     | 0.83           | 0.62        | 0.85        | <b>0.42</b> | 1.24        | 0.93        | 0.61         |
|                           |                                            | phosphate               | 1.22           | <b>1.76</b> | 0.74        | <b>0.62</b> | 1.36        | <b>1.96</b> | 1.14         |
| <b>Lipid</b>              |                                            | Medium Chain Fatty Acid | caproate (6:0) | <b>0.5</b>  | <b>0.54</b> | <b>0.58</b> | 1.01        | 0.62        | <b>0.67</b>  |
|                           | heptanoate (7:0)                           |                         | <b>0.57</b>    | <b>0.52</b> | 0.84        | 1.08        | 0.87        | 0.8         | 1.12         |
|                           | caprylate (8:0)                            |                         | 0.67           | <b>0.46</b> | 0.76        | 0.94        | 0.85        | <b>0.58</b> | 1.06         |
|                           | pelargonate (9:0)                          |                         | 0.78           | <b>0.46</b> | 0.93        | 1.06        | 1.14        | 0.67        | 1.29         |
|                           | caprate (10:0)                             |                         | 0.8            | <b>0.6</b>  | 0.92        | 0.97        | 1.04        | 0.77        | 1.1          |
|                           | undecanoate (11:0)                         |                         | 0.91           | 1.07        | 0.86        | 1.01        | 1           | 1.17        | 1.18         |
|                           | laurate (12:0)                             |                         | 0.75           | <b>0.52</b> | 0.89        | 0.85        | 0.98        | 0.69        | 0.94         |
|                           | Long Chain Fatty Acid                      | myristate (14:0)        | <b>0.62</b>    | <b>0.28</b> | 0.88        | 0.67        | 1.01        | <b>0.46</b> | 0.77         |
|                           |                                            | myristoleate (14:1n5)   | <b>0.51</b>    | <b>0.1</b>  | 0.82        | 0.54        | 1.17        | <b>0.22</b> | 0.77         |
|                           |                                            | pentadecanoate (15:0)   | 0.87           | <b>0.33</b> | 0.79        | 0.97        | 1.09        | <b>0.41</b> | 1.33         |
|                           |                                            | palmitate (16:0)        | 0.82           | <b>0.28</b> | 0.93        | 1.08        | 0.9         | <b>0.31</b> | 1.06         |
|                           |                                            | palmitoleate (16:1n7)   | <b>0.5</b>     | <b>0.15</b> | 0.67        | 0.63        | 1.06        | <b>0.33</b> | 1            |

|  |                                              |                                                    |      |      |      |      |      |      |       |
|--|----------------------------------------------|----------------------------------------------------|------|------|------|------|------|------|-------|
|  |                                              | margarate (17:0)                                   | 0.89 | 0.3  | 0.94 | 1.13 | 0.95 | 0.32 | 1.14  |
|  |                                              | 10-heptadecenoate (17:1n7)                         | 0.64 | 0.16 | 0.84 | 0.71 | 1.17 | 0.29 | 0.98  |
|  |                                              | stearate (18:0)                                    | 0.93 | 0.37 | 1.01 | 1.32 | 0.83 | 0.33 | 1.09  |
|  |                                              | oleate (18:1n9)                                    | 0.65 | 0.14 | 0.74 | 0.91 | 0.97 | 0.22 | 1.18  |
|  |                                              | cis-vaccenate (18:1n7)                             | 0.62 | 0.23 | 0.94 | 0.94 | 1.07 | 0.4  | 1.07  |
|  |                                              | nonadecanoate (19:0)                               | 1.05 | 0.42 | 1.3  | 1.32 | 0.97 | 0.38 | 0.98  |
|  |                                              | 10-nonadecenoate (19:1n9)                          | 0.64 | 0.14 | 0.92 | 0.7  | 1.07 | 0.23 | 0.8   |
|  |                                              | arachidate (20:0)                                  | 1.19 | 0.61 | 1.1  | 1.53 | 0.75 | 0.38 | 1.04  |
|  |                                              | eicosenoate (20:1n9 or 11)                         | 0.94 | 0.19 | 1.22 | 1.06 | 0.99 | 0.2  | 0.86  |
|  | Polyunsaturated Fatty Acid (n3 and n6)       | stearidonate (18:4n3)                              | 0.7  | 0.16 | 0.68 | 0.86 | 0.73 | 0.17 | 0.93  |
|  |                                              | eicosapentaenoate (EPA; 20:5n3)                    | 0.65 | 0.27 | 1.04 | 1.09 | 0.94 | 0.38 | 0.99  |
|  |                                              | docosapentaenoate (n3 DPA; 22:5n3)                 | 0.8  | 0.22 | 0.96 | 1.12 | 0.82 | 0.22 | 0.96  |
|  |                                              | docosahexaenoate (DHA; 22:6n3)                     | 0.82 | 0.21 | 1.12 | 1.49 | 0.92 | 0.23 | 1.22  |
|  |                                              | linoleate (18:2n6)                                 | 0.84 | 0.19 | 0.85 | 0.9  | 0.97 | 0.22 | 1.04  |
|  |                                              | linolenate [alpha or gamma; (18:3n3 or 6)]         | 0.79 | 0.12 | 0.83 | 0.85 | 0.91 | 0.14 | 0.94  |
|  |                                              | dihomo-linolenate (20:3n3 or n6)                   | 0.96 | 0.33 | 1.07 | 1.45 | 0.79 | 0.27 | 1.07  |
|  |                                              | arachidonate (20:4n6)                              | 0.87 | 0.21 | 1.03 | 1.66 | 0.9  | 0.22 | 1.46  |
|  |                                              | adrenate (22:4n6)                                  | 1.25 | 0.38 | 0.96 | 1.23 | 0.94 | 0.29 | 1.2   |
|  |                                              | docosapentaenoate (n6 DPA; 22:5n6)                 | 0.94 | 0.19 | 1.2  | 1.81 | 0.84 | 0.17 | 1.25  |
|  |                                              | docosadienoate (22:2n6)                            | 1.58 | 0.48 | 1.55 | 1.45 | 0.87 | 0.27 | 0.82  |
|  |                                              | dihomo-linoleate (20:2n6)                          | 0.85 | 0.21 | 1.04 | 1.18 | 0.8  | 0.2  | 0.91  |
|  |                                              | mead acid (20:3n9)                                 | 0.81 | 0.26 | 0.88 | 1.35 | 0.84 | 0.26 | 1.29  |
|  | Fatty Acid, Branched                         | 15-methylpalmitate (isobar with 2-methylpalmitate) | 0.73 | 0.48 | 0.96 | 0.89 | 1.09 | 0.72 | 1     |
|  |                                              | 17-methylstearate                                  | 0.7  | 0.24 | 1.25 | 0.9  | 0.98 | 0.34 | 0.71  |
|  | Fatty Acid, Dicarboxylate                    | 2-hydroxyglutarate                                 | 0.8  | 0.19 | 0.53 | 5.36 | 1.11 | 0.27 | 11.29 |
|  |                                              | azelate (nonanedioate)                             | 0.86 | 0.69 | 0.68 | 1.29 | 0.83 | 0.66 | 1.57  |
|  |                                              | tetradecanedioate                                  | 0.76 | 0.28 | 0.87 | 0.83 | 1.26 | 0.46 | 1.2   |
|  |                                              | hexadecanedioate                                   | 0.81 | 0.16 | 0.99 | 0.82 | 1.15 | 0.22 | 0.95  |
|  |                                              | octadecanedioate                                   | 0.78 | 0.24 | 1.12 | 0.73 | 1.14 | 0.34 | 0.74  |
|  | Fatty Acid, Amide                            | stearamide                                         | 0.73 | 0.58 | 0.58 | 1.41 | 0.66 | 0.52 | 1.61  |
|  | Fatty Acid Metabolism (also BCAA Metabolism) | butyrylcarnitine                                   | 1.46 | 0.61 | 1.03 | 1.27 | 0.87 | 0.37 | 1.06  |
|  |                                              | butyrylglycine                                     | 0.2  | 0.19 | 0.23 | 4.43 | 0.39 | 0.37 | 7.68  |
|  |                                              | propionylcarnitine                                 | 1.72 | 1.07 | 0.97 | 0.88 | 1.09 | 0.68 | 0.99  |
|  | Fatty Acid Metabolism                        | valerylglycine                                     | 0.39 | 0.37 | 0.38 | 3.4  | 0.55 | 0.52 | 4.97  |

|                                       |                                              |      |      |      |       |      |      |      |
|---------------------------------------|----------------------------------------------|------|------|------|-------|------|------|------|
| (Acyl Glycine)                        | hexanoylglycine                              | 0.12 | 0.05 | 0.22 | 1.29  | 0.53 | 0.24 | 3.06 |
| Fatty Acid Metabolism(Acyl Carnitine) | acetylcarnitine                              | 0.9  | 0.37 | 0.88 | 0.9   | 0.91 | 0.38 | 0.94 |
|                                       | hexanoylcarnitine                            | 1.05 | 0.26 | 0.9  | 0.93  | 0.84 | 0.21 | 0.86 |
|                                       | octanoylcarnitine                            | 0.9  | 0.42 | 0.71 | 1.02  | 0.88 | 0.41 | 1.26 |
|                                       | decanoylcarnitine                            | 0.9  | 0.54 | 0.81 | 0.78  | 0.78 | 0.47 | 0.76 |
|                                       | laurylcarnitine                              | 0.38 | 0.58 | 0.69 | 1.18  | 0.5  | 0.76 | 0.85 |
|                                       | myristoylcarnitine                           | 0.42 | 0.23 | 0.52 | 0.94  | 0.47 | 0.25 | 0.85 |
|                                       | palmitoylcarnitine                           | 0.44 | 0.13 | 0.53 | 0.92  | 0.56 | 0.16 | 0.96 |
|                                       | stearoylcarnitine                            | 0.46 | 0.24 | 0.81 | 1.14  | 0.62 | 0.32 | 0.87 |
|                                       | oleoylcarnitine                              | 0.44 | 0.09 | 0.57 | 0.87  | 0.72 | 0.15 | 1.08 |
| Carnitine Metabolism                  | deoxycarnitine                               | 1.18 | 0.67 | 0.98 | 1.02  | 0.95 | 0.54 | 0.98 |
|                                       | carnitine                                    | 1.13 | 0.85 | 1.05 | 0.9   | 1.03 | 0.78 | 0.88 |
|                                       | 3-dehydrocarnitine                           | 0.84 | 0.32 | 0.81 | 1.2   | 0.87 | 0.33 | 1.29 |
| Ketone Bodies                         | 3-hydroxybutyrate (BHBA)                     | 0.37 | 0.07 | 0.79 | 0.62  | 0.75 | 0.15 | 0.59 |
| Fatty Acid, Monohydroxy               | 4-hydroxybutyrate (GHB)                      | 0.83 | 0.46 | 0.78 | 0.93  | 0.55 | 0.31 | 0.66 |
|                                       | 2-hydroxypalmitate                           | 1.08 | 0.19 | 0.8  | 0.81  | 0.94 | 0.16 | 0.95 |
|                                       | 2-hydroxystearate                            | 0.81 | 0.22 | 0.77 | 0.77  | 0.91 | 0.25 | 0.91 |
|                                       | 3-hydroxypropanoate                          | 1.3  | 0.84 | 0.94 | 0.87  | 0.88 | 0.57 | 0.81 |
|                                       | 3-hydroxydecanoate                           | 0.82 | 0.28 | 1.17 | 0.54  | 0.92 | 0.32 | 0.43 |
|                                       | 3-hydroxylaurate                             | 0.61 | 0.22 | 1.34 | 0.61  | 1.01 | 0.36 | 0.46 |
|                                       | 16-hydroxypalmitate                          | 0.67 | 0.17 | 0.89 | 0.73  | 0.95 | 0.25 | 0.78 |
|                                       | 13-HODE + 9-HODE                             | 1.17 | 0.14 | 0.69 | 0.68  | 1.19 | 0.14 | 1.18 |
| Fatty Acid, Dihydroxy                 | 12,13-DiHOME                                 | 1.35 | 0.24 | 0.89 | 0.68  | 1.06 | 0.19 | 0.81 |
| Eicosanoid                            | 12-HETE                                      | 1.35 | 0.15 | 1.29 | 1.18  | 1.52 | 0.17 | 1.39 |
| Endocannabinoid                       | palmitoyl ethanolamide                       | 0.97 | 0.33 | 0.86 | 0.88  | 1.04 | 0.35 | 1.06 |
| Inositol Metabolism                   | myo-inositol                                 | 0.82 | 0.24 | 0.62 | 1.46  | 0.65 | 0.19 | 1.52 |
|                                       | pinitol                                      | 1.11 | 0.94 | 0.23 | 20.97 | 0.37 | 0.31 | 33.8 |
|                                       | scyllo-inositol                              | 0.74 | 0.22 | 0.57 | 1.52  | 0.64 | 0.19 | 1.73 |
|                                       | inositol 1-phosphate (IIP)                   | 0.81 | 0.4  | 0.95 | 1.02  | 0.94 | 0.47 | 1.01 |
| Phospholipid Metabolism               | choline                                      | 0.89 | 0.4  | 0.88 | 1.04  | 0.89 | 0.4  | 1.04 |
|                                       | ethanolamine                                 | 1.11 | 0.59 | 0.69 | 1.83  | 1.12 | 0.6  | 2.97 |
|                                       | phosphoethanolamine                          | 1.39 | 0.74 | 0.48 | 1     | 0.79 | 0.42 | 1.64 |
| Lysolipid                             | 2-myristoylglycerophosphocholine*            | 0.29 | 0.17 | 0.81 | 0.79  | 0.75 | 0.45 | 0.73 |
|                                       | 1-pentadecanoylglycerophosphocholine (15:0)* | 0.63 | 0.37 | 0.9  | 0.84  | 0.96 | 0.57 | 0.9  |



|                                                   |      |      |      |      |      |      |      |
|---------------------------------------------------|------|------|------|------|------|------|------|
| 1-palmitoylglycerophosphocholine (16:0)           | 0.69 | 0.36 | 0.94 | 0.97 | 0.84 | 0.44 | 0.86 |
| 2-palmitoylglycerophosphocholine*                 | 0.57 | 0.22 | 1.01 | 0.89 | 0.91 | 0.34 | 0.8  |
| 1-palmitoleoylglycerophosphocholine (16:1)*       | 0.24 | 0.26 | 0.9  | 0.79 | 0.82 | 0.91 | 0.72 |
| 2-palmitoleoylglycerophosphocholine*              | 0.35 | 0.34 | 0.91 | 0.93 | 0.94 | 0.9  | 0.96 |
| 1-margaroylglycerophosphocholine (17:0)           | 0.52 | 0.13 | 1    | 0.81 | 1.03 | 0.26 | 0.83 |
| 1-stearoylglycerophosphocholine (18:0)            | 0.61 | 0.2  | 0.87 | 1.01 | 0.82 | 0.27 | 0.95 |
| 2-stearoylglycerophosphocholine*                  | 0.67 | 0.19 | 1.03 | 1.25 | 0.89 | 0.26 | 1.08 |
| 1-oleoylglycerophosphocholine (18:1)              | 0.6  | 0.24 | 1.04 | 1.11 | 0.86 | 0.35 | 0.92 |
| 2-oleoylglycerophosphocholine*                    | 0.55 | 0.44 | 1.07 | 1.11 | 0.79 | 0.64 | 0.83 |
| 1-linoleoylglycerophosphocholine (18:2n6)         | 0.78 | 0.38 | 1.12 | 1.02 | 0.88 | 0.43 | 0.8  |
| 2-linoleoylglycerophosphocholine*                 | 0.53 | 0.51 | 1.1  | 1.13 | 0.73 | 0.7  | 0.75 |
| 1-dihomo-linoleoylglycerophosphocholine (20:2n6)* | 0.6  | 0.21 | 1.41 | 1.13 | 0.96 | 0.33 | 0.77 |
| 2-arachidoylglycerophosphocholine*                | 0.48 | 0.23 | 0.91 | 0.61 | 0.94 | 0.44 | 0.63 |
| 1-eicosatrienoylglycerophosphocholine (20:3)*     | 0.61 | 0.41 | 1.34 | 1.4  | 0.75 | 0.5  | 0.79 |
| 1-arachidonoylglycerophosphocholine (20:4n6)*     | 0.51 | 0.23 | 1.01 | 1.26 | 0.79 | 0.35 | 0.98 |
| 2-arachidonoylglycerophosphocholine*              | 0.35 | 0.27 | 0.83 | 1.81 | 0.58 | 0.45 | 1.27 |
| 1-docosapentaenoylglycerophosphocholine (22:5n3)* | 0.93 | 0.34 | 1.6  | 2.7  | 0.65 | 0.24 | 1.09 |
| 1-docosahexaenoylglycerophosphocholine (22:6n3)*  | 0.52 | 0.25 | 1.12 | 1.56 | 0.71 | 0.34 | 0.99 |
| 2-docosahexaenoylglycerophosphocholine*           | 0.54 | 0.3  | 1    | 2.11 | 0.66 | 0.36 | 1.39 |
| 1-palmitoylglycerophosphoethanolamine             | 0.71 | 0.16 | 0.95 | 1.02 | 0.86 | 0.19 | 0.92 |
| 2-palmitoylglycerophosphoethanolamine*            | 0.77 | 0.47 | 0.93 | 1.15 | 0.78 | 0.47 | 0.96 |
| 1-stearoylglycerophosphoethanolamine              | 0.69 | 0.25 | 1.2  | 1.2  | 0.73 | 0.27 | 0.73 |
| 1-oleoylglycerophosphoethanolamine                | 0.81 | 0.17 | 0.93 | 0.85 | 0.98 | 0.2  | 0.9  |
| 2-oleoylglycerophosphoethanolamine*               | 1.09 | 0.19 | 1.33 | 0.85 | 1.17 | 0.21 | 0.75 |
| 1-linoleoylglycerophosphoethanolamine*            | 1.05 | 0.3  | 1.01 | 1.1  | 0.75 | 0.21 | 0.82 |
| 2-linoleoylglycerophosphoethanolamine*            | 0.96 | 0.36 | 1    | 0.96 | 0.92 | 0.34 | 0.88 |
| 1-arachidonoylglycerophosphoethanolamine*         | 0.78 | 0.23 | 1.04 | 1.43 | 0.75 | 0.23 | 1.03 |
| 2-arachidonoylglycerophosphoethanolamine*         | 0.75 | 0.3  | 1.29 | 1.52 | 0.71 | 0.28 | 0.84 |

|            |                                         |                                                |      |      |      |       |      |      |       |
|------------|-----------------------------------------|------------------------------------------------|------|------|------|-------|------|------|-------|
|            |                                         | 2-docosahexaenoylglycerophosphoethanolamine*   | 0.36 | 0.35 | 0.85 | 1.11  | 0.68 | 0.66 | 0.89  |
|            |                                         | 1-palmitoylglycerophosphoinositol*             | 1.28 | 0.27 | 1.26 | 0.96  | 1.15 | 0.24 | 0.87  |
|            |                                         | 1-stearoylglycerophosphoinositol               | 1.08 | 0.24 | 1.09 | 1.37  | 0.95 | 0.21 | 1.2   |
|            |                                         | 1-linoleoylglycerophosphoinositol*             | 1.2  | 0.2  | 1.54 | 1.72  | 1.04 | 0.17 | 1.16  |
|            |                                         | 1-arachidonoylglycerophosphoinositol*          | 1    | 0.11 | 1.35 | 2.43  | 0.96 | 0.11 | 1.73  |
|            |                                         | 2-arachidonoylglycerophosphoinositol*          | 0.84 | 0.1  | 1.34 | 1.95  | 1.15 | 0.14 | 1.68  |
|            | Glycerolipid Metabolism                 | glycerol                                       | 0.93 | 0.62 | 0.82 | 0.78  | 1    | 0.67 | 0.95  |
|            | Glycerolipid Metabolism                 | glycerol 3-phosphate (G3P)                     | 0.89 | 0.21 | 0.74 | 1.15  | 0.94 | 0.22 | 1.46  |
|            | Monoacylglycerol                        | 1-palmitoylglycerol (1-monopalmitin)           | 0.91 | 0.22 | 0.64 | 1.5   | 0.74 | 0.18 | 1.75  |
|            | Monoacylglycerol                        | 1-stearoylglycerol (1-monostearin)             | 1.21 | 0.36 | 1.42 | 1.21  | 0.81 | 0.24 | 0.69  |
|            | Monoacylglycerol                        | 1-oleoylglycerol (1-monoolein)                 | 1.58 | 0.37 | 0.67 | 1.38  | 0.63 | 0.15 | 1.29  |
|            | Monoacylglycerol                        | 1-linoleoylglycerol (1-monolinolein)           | 1.81 | 0.26 | 0.73 | 1.18  | 0.8  | 0.11 | 1.31  |
|            | Sphingolipid Metabolism                 | sphinganine                                    | 0.4  | 0.27 | 0.72 | 0.79  | 0.56 | 0.37 | 0.61  |
|            | Sphingolipid Metabolism                 | palmitoyl sphingomyelin                        | 0.65 | 0.19 | 0.75 | 1.24  | 0.73 | 0.21 | 1.2   |
|            | Sphingolipid Metabolism                 | stearoyl sphingomyelin                         | 0.78 | 0.12 | 0.69 | 1.08  | 0.66 | 0.1  | 1.03  |
|            | Sphingolipid Metabolism                 | sphingosine                                    | 0.9  | 0.23 | 0.74 | 0.49  | 1.66 | 0.42 | 1.1   |
|            | Sterol                                  | cholesterol                                    | 0.84 | 0.37 | 0.87 | 1.43  | 0.74 | 0.33 | 1.21  |
|            | Sterol                                  | 7-alpha-hydroxy-3-oxo-4-cholestenoate (7-Hoca) | 0.84 | 0.23 | 0.84 | 1.21  | 0.89 | 0.25 | 1.29  |
|            | Sterol                                  | cholestanol                                    | 0.66 | 0.47 | 0.72 | 1.5   | 0.66 | 0.47 | 1.38  |
|            | Sterol                                  | beta-sitosterol                                | 0.82 | 0.66 | 1.14 | 1.7   | 0.63 | 0.51 | 0.95  |
|            | Sterol                                  | campesterol                                    | 0.75 | 0.41 | 0.86 | 1.24  | 0.7  | 0.39 | 1.02  |
|            | Steroid                                 | corticosterone                                 | 0.7  | 0.14 | 0.75 | 1.03  | 0.88 | 0.17 | 1.21  |
|            | Primary Bile Acid Metabolism            | cholate                                        | 1.02 | 0.5  | 0.32 | 5.22  | 0.2  | 0.1  | 3.28  |
|            | Primary Bile Acid Metabolism            | glycocholate                                   | 0.64 | 0.85 | 0.13 | 4.25  | 0.14 | 0.19 | 4.8   |
|            | Primary Bile Acid Metabolism            | taurocholate                                   | 0.43 | 0.07 | 0.01 | 12.19 | 0.05 | 0.01 | 40.9  |
|            | Primary Bile Acid Metabolism            | beta-muricholate                               | 2.18 | 0.27 | 1.26 | 1.18  | 0.92 | 0.11 | 0.86  |
|            | Primary Bile Acid Metabolism            | alpha-muricholate                              | 0.14 | 0.34 | 0.01 | 25.44 | 0.03 | 0.08 | 62.35 |
|            | Secondary Bile Acid Metabolism          | deoxycholate                                   | 0.9  | 0.2  | 1.09 | 0.97  | 1.44 | 0.33 | 1.29  |
|            | Secondary Bile Acid Metabolism          | taurodeoxycholate                              | 0.3  | 0.17 | 0.03 | 14.26 | 0.04 | 0.02 | 23.63 |
|            | Secondary Bile Acid Metabolism          | tauroolithocholate                             | 0.47 | 1    | 0.05 | 26.96 | 0.05 | 0.11 | 26.96 |
|            | Secondary Bile Acid Metabolism          | tauroursodeoxycholate                          | 0.51 | 0.08 | 0.01 | 32.09 | 0.04 | 0.01 | 94.96 |
| Nucleotide | Purine Metabolism, (Hypo)Xanthine/Inosi | inosine                                        | 0.93 | 0.13 | 1.35 | 0.48  | 0.5  | 0.07 | 0.18  |
|            | Purine Metabolism, (Hypo)Xanthine/Inosi | hypoxanthine                                   | 1.58 | 0.04 | 0.96 | 2.22  | 1.59 | 0.04 | 3.66  |

|                                                 |                                                  |                                   |      |       |      |      |      |       |      |
|-------------------------------------------------|--------------------------------------------------|-----------------------------------|------|-------|------|------|------|-------|------|
|                                                 | ne containing                                    | xanthine                          | 1.74 | 0.05  | 0.93 | 1.3  | 2.03 | 0.06  | 2.84 |
|                                                 |                                                  | xanthosine                        | 2.24 | 0.4   | 0.68 | 1.63 | 1.09 | 0.19  | 2.63 |
|                                                 |                                                  | urate                             | 1.35 | 0.12  | 0.7  | 0.93 | 1    | 0.09  | 1.32 |
|                                                 |                                                  | allantoin                         | 0.47 | 0.18  | 0.38 | 4.25 | 0.46 | 0.18  | 5.16 |
|                                                 | Purine Metabolism,<br>Adenine containing         | adenosine 5'-monophosphate (AMP)  | 0.94 | 34.51 | 0.72 | 1.36 | 0.72 | 26.41 | 1.36 |
|                                                 |                                                  | adenine                           | 0.67 | 0.58  | 0.67 | 4.69 | 0.54 | 0.47  | 3.77 |
|                                                 |                                                  | N1-methyladenosine                | 0.6  | 0.31  | 0.46 | 3.55 | 0.56 | 0.28  | 4.28 |
|                                                 |                                                  | N6-carbamoylthreonyladenosine     | 0.56 | 0.33  | 0.5  | 4.66 | 0.55 | 0.33  | 5.07 |
|                                                 | Purine Metabolism,<br>Guanine containing         | 7-methylguanine                   | 0.77 | 1.11  | 0.35 | 3.81 | 0.57 | 0.82  | 6.21 |
|                                                 |                                                  | N1-methylguanosine                | 0.62 | 0.73  | 0.37 | 4.56 | 0.5  | 0.59  | 6.19 |
|                                                 | Pyrimidine<br>Metabolism, Orotate<br>containing  | orotate                           | 0.56 | 0.58  | 0.56 | 4.55 | 0.48 | 0.5   | 3.93 |
|                                                 | Pyrimidine<br>Metabolism, Uracil<br>containing   | uridine                           | 1.34 | 0.56  | 1.06 | 0.75 | 0.96 | 0.41  | 0.69 |
|                                                 |                                                  | uracil                            | 2    | 0.53  | 0.78 | 0.89 | 1.07 | 0.28  | 1.23 |
|                                                 |                                                  | pseudouridine                     | 0.92 | 0.68  | 0.84 | 2.45 | 0.68 | 0.5   | 2.01 |
|                                                 |                                                  | 5,6-dihydrouracil                 | 0.79 | 0.38  | 1.08 | 1.23 | 1.18 | 0.56  | 1.33 |
|                                                 |                                                  | 2'-deoxyuridine                   | 1.04 | 0.53  | 0.97 | 1.18 | 0.72 | 0.37  | 0.88 |
|                                                 |                                                  | 3-ureidopropionate                | 0.7  | 0.17  | 0.38 | 2.37 | 0.55 | 0.14  | 3.43 |
|                                                 |                                                  | N-acetyl-beta-alanine             | 1.17 | 0.51  | 0.86 | 1.71 | 0.8  | 0.35  | 1.6  |
|                                                 | Pyrimidine<br>Metabolism, Cytidine<br>containing | cytidine                          | 1.12 | 0.38  | 0.85 | 0.73 | 0.95 | 0.32  | 0.82 |
|                                                 |                                                  | N4-acetylcytidine                 | 0.79 | 0.76  | 0.75 | 1.97 | 0.85 | 0.82  | 2.23 |
| 2'-deoxycytidine                                |                                                  | 0.85                              | 0.58 | 0.88  | 1.08 | 0.75 | 0.52 | 0.92  |      |
| Pyrimidine<br>Metabolism, Thymine<br>containing | thymidine                                        | 0.8                               | 0.47 | 0.93  | 0.79 | 0.76 | 0.45 | 0.64  |      |
| <b>Cofactors and<br/>Vitamins</b>               | Nicotinate and<br>Nicotinamide<br>Metabolism     | nicotinamide                      | 0.94 | 0.2   | 0.68 | 1.02 | 0.95 | 0.2   | 1.42 |
|                                                 | Riboflavin<br>Metabolism                         | riboflavin (Vitamin B2)           | 0.75 | 0.4   | 0.42 | 5.04 | 0.45 | 0.24  | 5.39 |
|                                                 |                                                  | flavin adenine dinucleotide (FAD) | 1.05 | 0.65  | 0.99 | 1    | 0.9  | 0.56  | 0.91 |
|                                                 | Pantothenate and CoA<br>Metabolism               | pantothenate                      | 1.08 | 0.25  | 0.81 | 2.24 | 0.75 | 0.17  | 2.06 |
|                                                 | Ascorbate and<br>Aldarate Metabolism             | gulono-1,4-lactone                | 0.44 | 0.19  | 0.32 | 6.03 | 0.3  | 0.13  | 5.73 |
|                                                 |                                                  | ascorbate (Vitamin C)             | 0.98 | 0.27  | 0.48 | 4.39 | 0.32 | 0.09  | 2.9  |
|                                                 |                                                  | threonate                         | 0.79 | 0.08  | 0.66 | 1.69 | 0.76 | 0.08  | 1.94 |
| arabonate                                       |                                                  | 0.47                              | 0.17 | 0.32  | 3.89 | 0.51 | 0.18 | 6.21  |      |

|                    |                                     |                                 |      |      |      |       |      |      |       |
|--------------------|-------------------------------------|---------------------------------|------|------|------|-------|------|------|-------|
|                    |                                     | oxalate (ethanedioate)          | 0.7  | 0.43 | 0.79 | 1.48  | 0.68 | 0.42 | 1.28  |
|                    | Tocopherol Metabolism               | alpha-tocopherol                | 0.85 | 0.18 | 1.05 | 1.29  | 0.84 | 0.18 | 1.03  |
|                    | Tetrahydrobiopterin Metabolism      | dihydrobiopterin                | 0.53 | 0.23 | 0.35 | 4.13  | 0.43 | 0.19 | 5.07  |
|                    | Hemoglobin and Porphyrin Metabolism | heme                            | 0.95 | 1.09 | 1.31 | 0.67  | 1.04 | 1.2  | 0.53  |
|                    |                                     | bilirubin (E,E)*                | 0.38 | 0.5  | 0.67 | 0.65  | 1.12 | 1.49 | 1.09  |
|                    |                                     | biliverdin                      | 0.81 | 0.31 | 1.03 | 0.88  | 0.95 | 0.36 | 0.81  |
|                    |                                     | L-urobilin                      | 1    | 1    | 1    | 1     | 1    | 1    | 1     |
|                    | Vitamin B6 Metabolism               | pyridoxate                      | 0.63 | 0.24 | 0.38 | 6.33  | 0.45 | 0.17 | 7.57  |
| Xenobiotics        | Benzoate Metabolism                 | hippurate                       | 0.36 | 0.4  | 0.28 | 9.78  | 0.48 | 0.53 | 16.34 |
|                    |                                     | 4-hydroxyhippurate              | 0.28 | 0.26 | 0.15 | 3.39  | 0.56 | 0.52 | 12.9  |
|                    |                                     | benzoate                        | 0.8  | 0.84 | 1.24 | 1.33  | 1.13 | 1.17 | 1.21  |
|                    |                                     | catechol sulfate                | 0.72 | 0.46 | 0.43 | 5.15  | 0.73 | 0.47 | 8.72  |
|                    |                                     | 4-ethylphenylsulfate            | 0.8  | 0.61 | 0.49 | 7.1   | 0.49 | 0.37 | 7.08  |
|                    |                                     | 4-vinylphenol sulfate           | 0.49 | 0.06 | 0.61 | 1.15  | 0.72 | 0.09 | 1.35  |
|                    | Food Component/Plant                | 2-oxindole-3-acetate            | 0.64 | 0.6  | 0.43 | 13.25 | 0.41 | 0.38 | 12.72 |
|                    |                                     | 5-hydroxymethylfurfural         | 0.9  | 0.36 | 0.94 | 0.97  | 0.77 | 0.31 | 0.8   |
|                    |                                     | cinnamoylglycine                | 0.22 | 0.22 | 0.26 | 5.1   | 0.59 | 0.6  | 11.51 |
|                    |                                     | daidzein                        | 0.9  | 1    | 0.9  | 4.56  | 0.9  | 1    | 4.56  |
|                    |                                     | equol glucuronide               | 0.82 | 0.61 | 0.36 | 33.73 | 0.22 | 0.16 | 20.59 |
|                    |                                     | equol sulfate                   | 1.17 | 0.82 | 0.95 | 4.59  | 0.68 | 0.48 | 3.3   |
|                    |                                     | ergothioneine                   | 0.67 | 0.36 | 0.7  | 1.37  | 1.26 | 0.67 | 2.46  |
|                    |                                     | erythritol                      | 0.61 | 0.34 | 0.39 | 4.33  | 0.55 | 0.31 | 6.13  |
|                    |                                     | galacturonate                   | 0.65 | 0.4  | 0.67 | 3.94  | 0.71 | 0.43 | 4.18  |
|                    |                                     | indoleacrylate                  | 1.57 | 0.93 | 1.33 | 1.63  | 0.7  | 0.42 | 0.87  |
|                    |                                     | N-(2-furoyl)glycine             | 0.21 | 0.42 | 0.22 | 4.5   | 0.5  | 1    | 10.38 |
|                    |                                     | N-glycolylneuraminate           | 0.64 | 0.07 | 0.15 | 0.81  | 0.59 | 0.06 | 3.1   |
|                    |                                     | stachydrine                     | 1.53 | 0.73 | 1.09 | 2.31  | 0.79 | 0.38 | 1.68  |
|                    | Drug                                | 4-acetylphenol sulfate          | 0.26 | 0.55 | 0.24 | 15.54 | 0.37 | 0.8  | 24.54 |
|                    | Chemical                            | 1-(3-aminopropyl)-2-pyrrolidone | 0.42 | 0.54 | 0.39 | 3.84  | 0.42 | 0.54 | 4.09  |
|                    |                                     | 2-ethylhexanoate                | 0.67 | 0.34 | 0.91 | 1.39  | 1.09 | 0.54 | 1.67  |
|                    |                                     | 2-hydroxyisobutyrate            | 0.76 | 0.51 | 1.08 | 1.31  | 0.89 | 0.6  | 1.07  |
| diisopropanolamine |                                     | 0.56                            | 0.38 | 0.85 | 0.77 | 1.1   | 0.74 | 0.99 |       |
| EDTA               |                                     | 1                               | 1.13 | 1    | 1    | 1     | 1.13 | 1    |       |

|  |                            |      |       |      |      |      |        |      |
|--|----------------------------|------|-------|------|------|------|--------|------|
|  | glycolate (hydroxyacetate) | 0.83 | 0.36  | 0.73 | 1.39 | 0.71 | 0.31   | 1.35 |
|  | iminodiacetate (IDA)       | 1    | 1.49  | 1    | 1    | 1    | 1.49   | 1    |
|  | trizma acetate             | 0.76 | 84.69 | 0.61 | 3.98 | 1.05 | 117.21 | 6.82 |

Serum samples were assayed for 361 metabolites at 2mo and 7mo of age, using mass spectrometry (n=6/group).

Green highlight: decrease,  $p \leq 0.05$ ; Light green highlight: decrease,  $0.05 < p < 0.10$ ; Red highlight: increase,  $p \leq 0.05$ ; Pink highlight: increase,  $0.05 < p \leq 0.10$ ; No highlight:  $p > 0.10$ .

**a.**

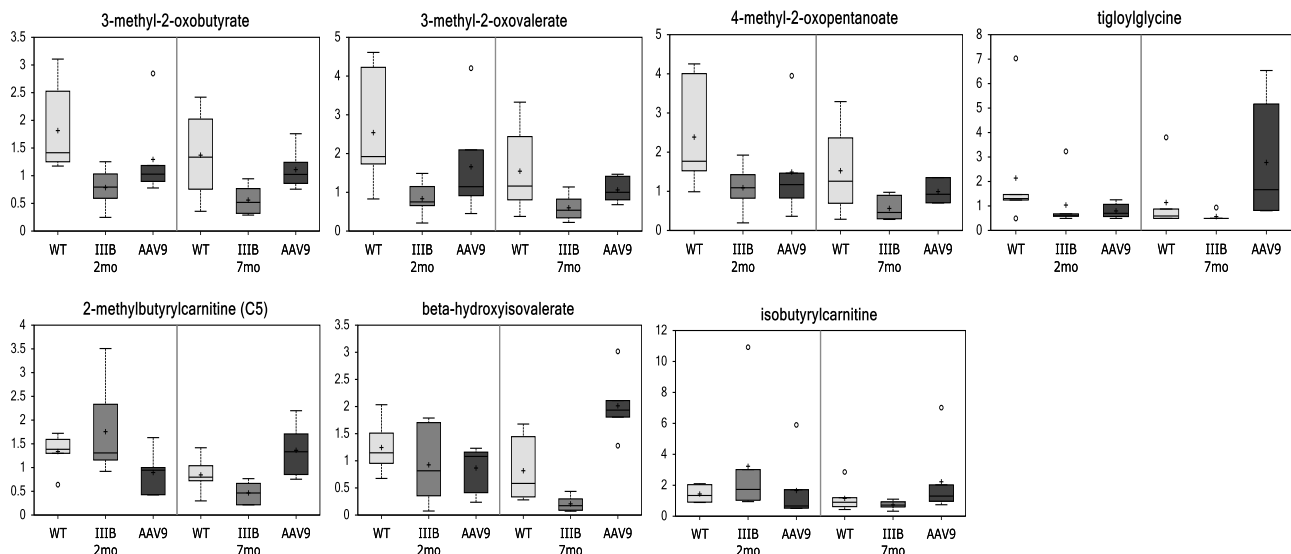

**b.**

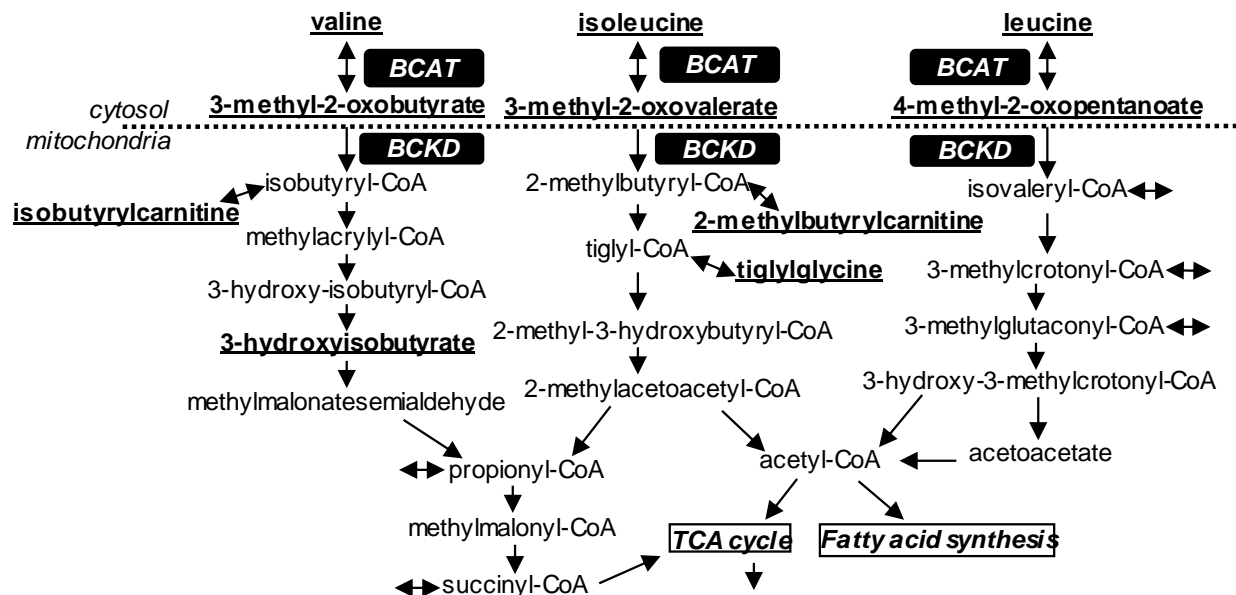

**Supplementary Fig. S1 Impairments of branched-chain amino acid metabolism during disease progression in MPS IIIB mice** Mouse serum samples were analyzed by global metabolomic profiling using mass spectrometry at age 2m or 7mo (n=6/group). **a.** Metabolomic comparison: data are presented as Scaled Intensity (y-axis),  $p \leq 0.05$  IIIB-7m vs. WT-7m; **WT**: wildtype mice; **IIIB**: MPS IIIB mice; **AAV9**: MPS IIIB mice treated at age 1m with an IV injection of  $5 \times 10^{12}$  vg/kg rAAV9-CMV-hNAGLU. **b.** Branched-chain amino acid metabolism pathway: **BCAT**: branched chain aminotransferase; **BCKD**: branched-chain alpha-keto acid dehydrogenase complex; Bold and underlined metabolites:  $p \leq 0.05$  IIIB-7m vs. WT-7m.

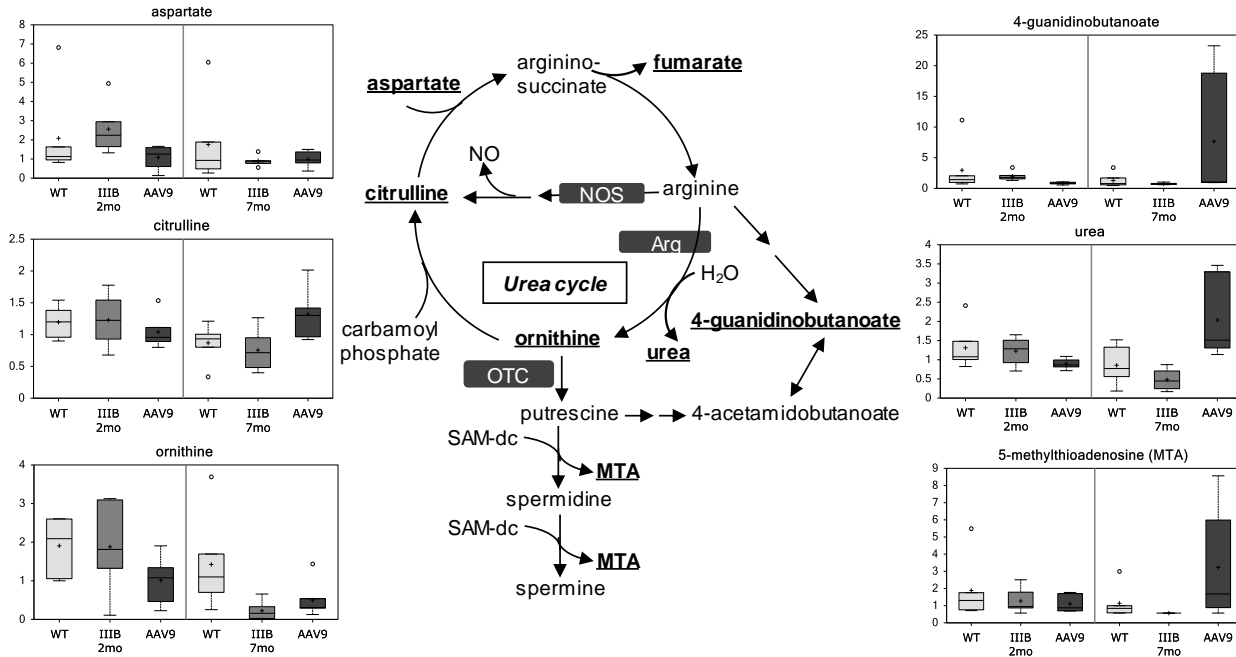

**Supplementary Fig. S2. Impairments of urea cycle during disease progression in MPS III B mice** Mouse serum samples were analyzed by global metabolomic profiling using mass spectrometry at age 2mo or 7mo (n=6/group). **a.** Metabolomic comparison: data are presented as Scaled Intensity (y-axis),  $p \leq 0.05$  IIB-7m vs. WT-7m; **WT**: wildtype mice; **IIB**: MPS IIB mice; **AAV9**: MPS IIB mice treated at age 1m with an IV injection of  $5 \times 10^{12}$  vg/kg rAAV9-CMV-hNAGLU. Bold and underlined metabolites in urea cycle pathway:  $p \leq 0.05$  IIB-7m vs. WT-7m.

**a.**

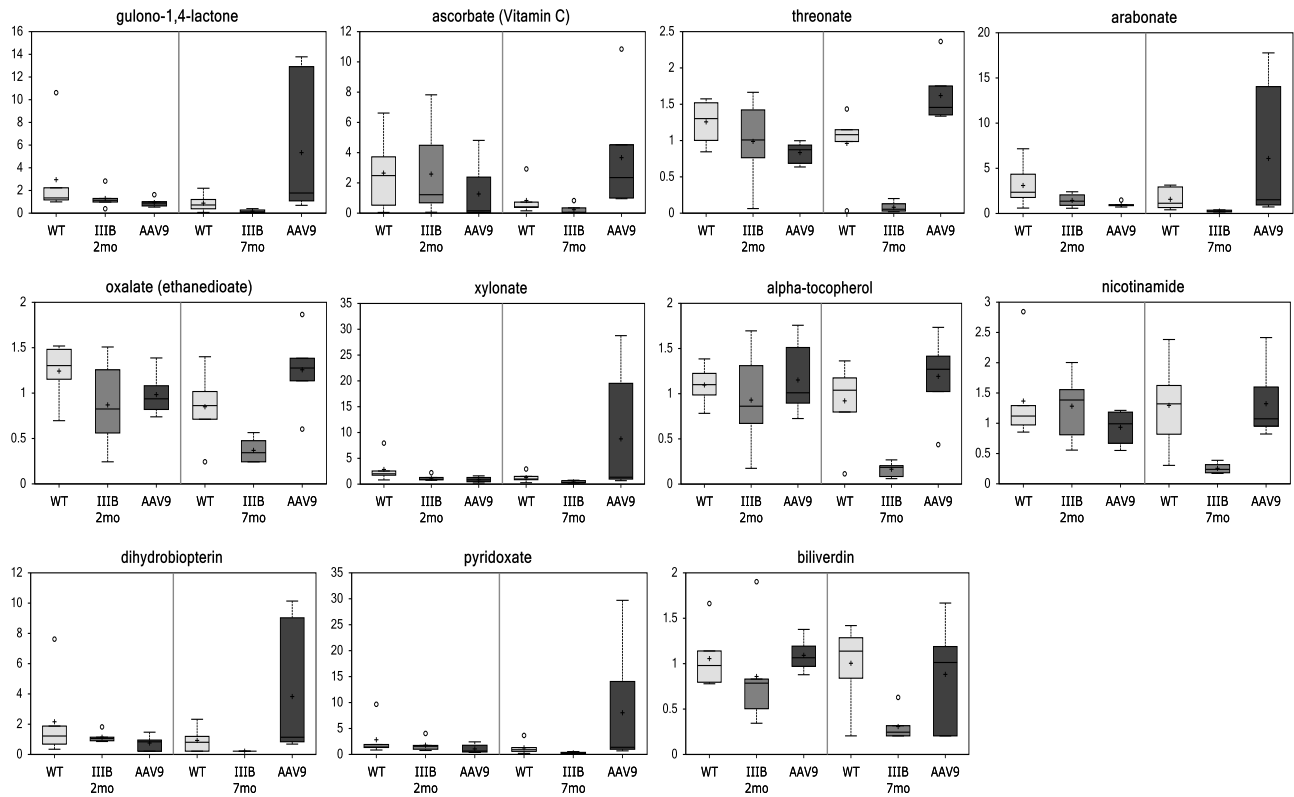

**b. Ascorbate (Vitamin C) metabolism pathway**

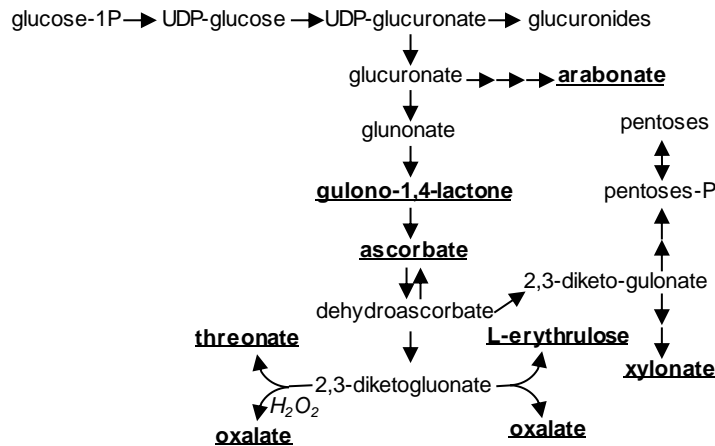

**Supplementary Fig. S3. Depressed Vitamin metabolism in MPS IIB during disease progress** Mouse serum samples were analyzed by global metabolomic profiling using mass spectrometry at age 2m or 7mo (n=6/group). **a.** Metabolomic comparison: data are presented as Scaled Intensity (y-axis),  $p \leq 0.05$  IIB-7m vs. WT-7m; **WT**: wildtype mice; **IIB**: MPS IIB mice; **AAV9**: MPS IIB mice treated at age 1m with an IV injection of  $5 \times 10^{12}$ vg/kg rAAV9-CMV-hNAGLU. **b.** Disturbance of Vitamin C metabolism pathway: Bold and underlined metabolites:  $p \leq 0.05$  IIB-7m vs. WT-7m.



**a.**

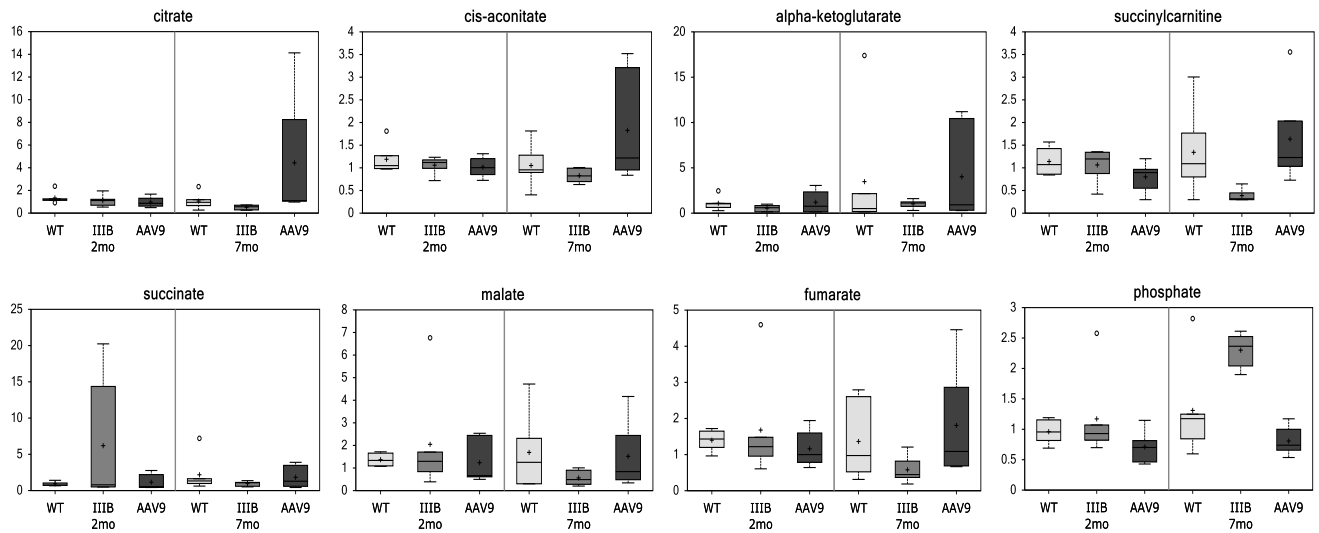

**b. TCA pathway**

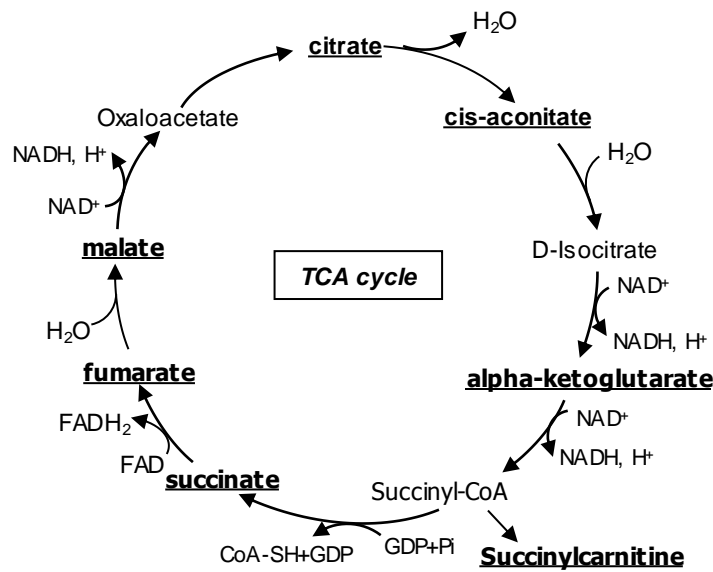

**Supplementary Fig. S4. Depressed energy metabolism in MPS IIB during disease progress** Mouse serum samples were analyzed by global metabolomic profiling using mass spectrometry at age 2m or 7mo ( $n=6$ /group). **a.** Metabolomic comparison: data are presented as Scaled Intensity (y-axis),  $p \leq 0.05$  IIB-7m vs. WT-7m; **WT**: wildtype mice; **IIB**: MPS IIB mice; **AAV9**: MPS IIB mice treated at age 1m with an IV injection of  $5 \times 10^{12}$  vg/kg rAAV9-CMV-hNAGLU. **b.** Disturbance of energy metabolism pathway: Bold and underlined metabolites:  $p \leq 0.05$  IIB-7m vs. WT-7m.
